# Supplementary material
Source: PubMed Central journal article supplement (PMC7289554)
Supplement: jiaa020_suppl_supplementary_table1.pdf [file jiaa020_suppl_supplementary_table1.pdf]

**Supplementary Table 1: Average coverage of whole genome and of genes in non-repetitive regions for each sample.**

|                        | Samples |          |          |          |          |          |          |          |           | Segment Size (BP) |
|------------------------|---------|----------|----------|----------|----------|----------|----------|----------|-----------|-------------------|
|                        | Brother | Sample 1 | Sample 2 | Sample 3 | Sample 4 | Sample 6 | Sample 8 | Sample 9 | Sample 11 |                   |
| <b>Whole Genome</b>    | 114.6   | 86.8     | 156.4    | 790.7    | 119.6    | 892.7    | 248.3    | 206.6    | 550.3     |                   |
| <b>UL1</b>             | 133.4   | 76.8     | 167.4    | 764.4    | 125.8    | 881.3    | 234.4    | 202.9    | 536.1     | 675               |
| <b>UL2</b>             | 139.1   | 98.9     | 209      | 1017.4   | 167.4    | 1067.8   | 306.7    | 258.9    | 633.3     | 1005              |
| <b>UL3</b>             | 152.5   | 101.5    | 204.5    | 887.2    | 169      | 1058.4   | 247.6    | 240.8    | 636.9     | 675               |
| <b>UL4</b>             | 134.5   | 100.6    | 190.1    | 893.8    | 154.5    | 1100.7   | 299.7    | 249.9    | 658       | 600               |
| <b>UL5</b>             | 142.5   | 121.5    | 207.2    | 1033     | 166.9    | 1165.8   | 311.6    | 273.4    | 708.1     | 2649              |
| <b>UL6</b>             | 112.7   | 106.3    | 192.3    | 947.7    | 138.2    | 1044.1   | 287      | 261      | 668.3     | 2031              |
| <b>UL7</b>             | 113.9   | 107      | 189.1    | 969      | 149.4    | 1099.6   | 274.9    | 275.6    | 617.6     | 891               |
| <b>UL8</b>             | 115.3   | 89.3     | 180.5    | 841.6    | 116.4    | 908.9    | 251.1    | 224.3    | 583.7     | 2253              |
| <b>UL9</b>             | 173.3   | 105.3    | 204.4    | 994.9    | 167.4    | 1114.6   | 287.4    | 258.2    | 701       | 2556              |
| <b>UL10</b>            | 123.9   | 103.8    | 195.2    | 930.9    | 126.9    | 1067.9   | 272.1    | 252.3    | 640.4     | 1422              |
| <b>UL11</b>            | 100.2   | 103.3    | 147      | 884.8    | 170.3    | 966.7    | 259.5    | 225.9    | 612.4     | 291               |
| <b>UL12</b>            | 101.1   | 92.2     | 158      | 804.8    | 130.7    | 910      | 247      | 226      | 565.1     | 1881              |
| <b>UL13</b>            | 148.8   | 105.8    | 186.1    | 910.2    | 136.4    | 1013     | 287.5    | 244.4    | 627.5     | 1557              |
| <b>UL14</b>            | 121.5   | 106.4    | 176.6    | 934.1    | 131.2    | 1036.1   | 268.3    | 260.2    | 630.6     | 660               |
| <b>UL15, Segment 1</b> | 145.5   | 113.7    | 220.1    | 933      | 139.1    | 1074.2   | 280.4    | 246.4    | 709.7     | 1029              |
| <b>UL15, Segment 2</b> | 155.7   | 85.5     | 174.6    | 856.3    | 140.4    | 961.1    | 249.9    | 211.8    | 581.1     | 1179              |
| <b>UL16</b>            | 137.3   | 80       | 167.2    | 827.6    | 128.8    | 936.6    | 247.7    | 202.1    | 533.1     | 1122              |
| <b>UL17</b>            | 123.2   | 88.7     | 176.7    | 873.1    | 116.2    | 1002.9   | 254      | 235.9    | 591.6     | 2112              |
| <b>UL18</b>            | 138     | 102.2    | 168.6    | 847.7    | 136.1    | 968.2    | 258.8    | 252.7    | 641.4     | 957               |
| <b>UL19</b>            | 132.5   | 110      | 167.9    | 903.8    | 128.8    | 997.6    | 265.5    | 233.4    | 635.6     | 4125              |
| <b>UL20</b>            | 129.9   | 94.6     | 173.5    | 937.1    | 136      | 1049.9   | 278.1    | 233.2    | 668.1     | 669               |
| <b>UL21</b>            | 124.9   | 91.5     | 157.6    | 830.9    | 125.7    | 955.9    | 263.2    | 215.9    | 634       | 1608              |
| <b>UL22</b>            | 133.7   | 101.1    | 171      | 872.4    | 132.5    | 952.3    | 266.6    | 238.1    | 571.8     | 2517              |
| <b>UL23</b>            | 131.6   | 93.7     | 165.5    | 845.8    | 136      | 1000.4   | 248      | 211      | 581       | 1131              |
| <b>UL24</b>            | 106.8   | 103.8    | 161.8    | 884.2    | 133.1    | 1007.6   | 258.5    | 188.3    | 599.5     | 810               |
| <b>UL25</b>            | 126.3   | 91.2     | 168.5    | 872      | 120.9    | 987.8    | 261      | 259.6    | 607.3     | 1743              |
| <b>UL26</b>            | 91.2    | 86.1     | 148.1    | 772.4    | 105.7    | 839.9    | 224.3    | 214.7    | 532.2     | 1908              |
| <b>UL27</b>            | 131.5   | 97.9     | 176.3    | 872.6    | 127.9    | 1022.1   | 279      | 230.2    | 641.2     | 2715              |
| <b>UL28</b>            | 105.6   | 95.4     | 164      | 783.3    | 111.5    | 868.4    | 246.5    | 226.5    | 582       | 2358              |
| <b>UL29</b>            | 135.1   | 98.3     | 178.3    | 910.3    | 124.3    | 992.9    | 386.8    | 255.3    | 635.2     | 3591              |
| <b>UL30</b>            | 131.4   | 100.5    | 168.8    | 901.1    | 136.5    | 1053.4   | 315.8    | 247.9    | 649.6     | 3708              |
| <b>UL31</b>            | 121.2   | 100.7    | 168.3    | 954.9    | 150.3    | 1061.2   | 274.7    | 266      | 690.7     | 921               |
| <b>UL32</b>            | 128.9   | 96.3     | 178.8    | 866.5    | 116.4    | 997.8    | 267.6    | 231.4    | 626.5     | 1791              |
| <b>UL33</b>            | 105.8   | 97.1     | 183.9    | 840.3    | 115.7    | 993.4    | 263.6    | 222.3    | 574.1     | 393               |
| <b>UL34</b>            | 89.3    | 87.9     | 161.8    | 772.8    | 113.7    | 980      | 270.5    | 206.1    | 596.7     | 828               |
| <b>UL35</b>            | 134     | 118.3    | 194.1    | 904      | 120.8    | 1034     | 303.8    | 255.3    | 683.2     | 339               |
| <b>UL36</b>            | 111.7   | 84       | 141.4    | 681.4    | 101.4    | 818.2    | 209.1    | 194.4    | 511.6     | 9420              |
| <b>UL37</b>            | 148     | 104.9    | 174.6    | 804.2    | 120.9    | 966      | 252      | 223.1    | 617       | 3372              |
| <b>UL38</b>            | 123     | 96.3     | 163.3    | 740.1    | 109.8    | 916.9    | 239.1    | 201.5    | 584.8     | 1398              |
| <b>UL39</b>            | 144.8   | 102.6    | 180.9    | 824.7    | 134.5    | 1042.9   | 262.3    | 236      | 616.6     | 3414              |
| <b>UL40</b>            | 94.7    | 100.1    | 167.3    | 858.1    | 161.2    | 1026.5   | 252.8    | 249.5    | 660.4     | 1023              |
| <b>UL41</b>            | 122.1   | 90.3     | 149.7    | 806.6    | 141.5    | 997.4    | 253.3    | 207.6    | 593.8     | 1470              |
| <b>UL42</b>            | 124.8   | 99.6     | 172.4    | 828.5    | 124.7    | 1008.4   | 260.2    | 252.5    | 637       | 1467              |
| <b>UL43</b>            | 101.7   | 86.4     | 151.6    | 706.6    | 98.1     | 836.3    | 220.9    | 203.1    | 525.2     | 1254              |
| <b>UL44</b>            | 132.1   | 85       | 148.4    | 731.8    | 116.6    | 846.9    | 207.5    | 183.4    | 498.7     | 1536              |
| <b>UL45</b>            | 183     | 111.4    | 173.8    | 771.8    | 142      | 961.1    | 273.3    | 208.2    | 615       | 519               |
| <b>UL46</b>            | 137.6   | 97.2     | 162.5    | 758.8    | 115.2    | 907.9    | 236.2    | 216.7    | 546.5     | 2157              |
| <b>UL47</b>            | 109.3   | 100.8    | 165.2    | 730.6    | 104.2    | 901.4    | 222.6    | 200.4    | 533.3     | 2082              |
| <b>UL48</b>            | 131.9   | 88.5     | 169      | 762.7    | 139.7    | 994.3    | 247      | 208.4    | 595.5     | 1473              |
| <b>UL49</b>            | 135.1   | 91.5     | 161.2    | 734.7    | 123.9    | 931.8    | 234.3    | 234.1    | 578.8     | 906               |
| <b>UL49A</b>           | 74.9    | 95.4     | 173.8    | 750.3    | 145.9    | 1037.8   | 236.5    | 211.7    | 562.9     | 276               |
| <b>UL50</b>            | 96.9    | 93.4     | 166.9    | 824.7    | 137.4    | 1002.2   | 272.8    | 225.4    | 599.8     | 1116              |
| <b>UL51</b>            | 155.5   | 89.2     | 186.1    | 823.6    | 135.1    | 994      | 262.8    | 185.4    | 596.8     | 735               |
| <b>UL52</b>            | 115.1   | 99.6     | 176.1    | 840.8    | 133.2    | 1037.2   | 273.9    | 240.9    | 606.6     | 3177              |
| <b>UL53</b>            | 166.9   | 93.1     | 179      | 930.1    | 150.4    | 1149.5   | 292      | 232.9    | 622.3     | 1017              |
| <b>UL54</b>            | 108.5   | 83.9     | 164.9    | 757.4    | 128.2    | 922.9    | 229.9    | 208.4    | 587.3     | 1539              |
| <b>UL55</b>            | 116.5   | 100.4    | 161.6    | 837.1    | 157.2    | 1001.2   | 247.7    | 212.3    | 603.1     | 561               |
| <b>UL56</b>            | 125.4   | 95.2     | 194.8    | 767.6    | 142.8    | 928.1    | 248.2    | 204.3    | 588.1     | 705               |
| <b>US1</b>             | 163     | 103.1    | 190.5    | 974      | 155.9    | 977.9    | 322.3    | 258.3    | 609.2     | 1263              |
| <b>US2</b>             | 135.4   | 86.4     | 188.2    | 893.7    | 142.8    | 981.3    | 323.8    | 240.9    | 592.1     | 876               |
| <b>US3</b>             | 126.4   | 96.2     | 208      | 954.1    | 160.7    | 1071     | 323.4    | 241.6    | 582.9     | 1446              |
| <b>US4</b>             | 93.5    | 59.9     | 121.7    | 649.6    | 103.8    | 722.7    | 195.4    | 142.2    | 411.7     | 717               |
| <b>US5</b>             | 110.9   | 90.1     | 147.8    | 808.3    | 111      | 872.7    | 237.8    | 196.2    | 380.9     | 279               |
| <b>US6</b>             | 146.4   | 87.9     | 187      | 940      | 134.3    | 1006.7   | 285.5    | 228.8    | 582.9     | 1185              |
| <b>US7</b>             | 85.8    | 60.3     | 143.3    | 667.8    | 112.7    | 734.5    | 204.6    | 170      | 426.7     | 1173              |
| <b>US8</b>             | 110.9   | 79.2     | 179.6    | 831.6    | 126.8    | 908.3    | 325.8    | 224.4    | 537.7     | 1653              |
| <b>US8A</b>            | 122     | 81.6     | 198.1    | 788.6    | 138.5    | 834.9    | 407.3    | 216.1    | 554       | 480               |
| <b>US9</b>             | 99.5    | 67.5     | 171      | 816.4    | 171.3    | 892.6    | 450.6    | 208.7    | 538.4     | 273               |
| <b>US10</b>            | 148.9   | 117.2    | 228      | 1055.1   | 130.8    | 1030.6   | 490      | 265.2    | 714.3     | 939               |
| <b>US11</b>            | 156.5   | 130.6    | 221.9    | 1065     | 134      | 1009.1   | 462.4    | 262.6    | 693.6     | 486               |
| <b>US12</b>            | 106.9   | 124.6    | 203.6    | 1055.2   | 150.3    | 1035.2   | 483.4    | 289.4    | 711.9     | 267               |
