# Supplementary material
Source: PubMed Central journal article supplement (PMC7289554)
Supplement: jiaa020_suppl_supplementary_table2.pdf [file jiaa020_suppl_supplementary_table2.pdf]

**Supplementary Table 2: Patient's anti-viral treatment regimens prior to study period.** Treatment years given relative to years of study period.

| Beginning Month |         | Ending Month |         | Acyclovir Dose | mg/kg/day | Reason for Treatment                                |
|-----------------|---------|--------------|---------|----------------|-----------|-----------------------------------------------------|
| October         | Year -9 | January      | Year -8 | 220 mg BID PO  | 41        | Prophylaxis                                         |
| February        | Year -8 | February     | Year -8 | 220 mg QID PO  | 72        | Treatment of Tongue Lesion                          |
| March           | Year -8 | July         | Year -8 | 220 mg BID PO  | 36        | Prophylaxis                                         |
| August          | Year -8 | December     | Year -8 | 180 mg BID PO  | 28        | Prophylaxis                                         |
| January         | Year -7 | January      | Year -7 | 280 mg QID PO  | 82        | Treatment of Atopic Dermatitis with Prurigo Nodules |
| January         | Year -7 | March        | Year -7 | 280 mg BID PO  | 41        | Prophylaxis                                         |
| April           | Year -7 | April        | Year -7 | 280 mg QID PO  | 77        | Treatment of Left Eyelid Lesion                     |
| May             | Year -7 | July         | Year -7 | 400 mg TID PO  | 82        | Treatment of Atopic Dermatitis with Prurigo Nodules |
| August          | Year -7 | August       | Year -7 | 400 mg BID PO  | 50        | Prophylaxis                                         |
| September       | Year -7 | March        | Year -6 | 440 mg TID PO  | 82.5      | Treatment of Eczema Herpeticum                      |
| April           | Year -6 | April        | Year -6 | 480 mg QID PO  | 120       | Treatment of Eczema Herpeticum                      |
| April           | Year -6 | May          | Year -6 | 540 mg TID PO  | 101       | Treatment of Eczema Herpeticum                      |
| June            | Year -6 | November     | Year -6 | 480 mg TID PO  | 87        | Prophylaxis                                         |
| December        | Year -6 | December     | Year -6 | 480 mg BID PO  | 55        | Prophylaxis                                         |
| December        | Year -6 | December     | Year -6 | 480 mg QID PO  | 111       | Treatment of Pneumonia                              |
| January         | Year -5 | February     | Year -4 | 480 mg BID PO  | 54        | Prophylaxis                                         |
| March           | Year -4 | March        | Year -4 | 480 mg QID PO  | 94        | Treatment of Face Lesion                            |
| April           | Year -4 | April        | Year -4 | 480 mg TID PO  | 70        | Prophylaxis                                         |
| April           | Year -4 | June         | Year -4 | 480 mg QID PO  | 93        | Treatment of Eczematous Dermatitis of Neck          |
| June            | Year -4 | June         | Year -4 | 680 mg TID PO  | 98        | Treatment of Eczematous Dermatitis of Neck          |
| July            | Year -4 | July         | Year -4 | 680 mg QID PO  | 131       | Treatment of Eczematous Dermatitis of Neck          |
| August          | Year -4 | September    | Year -4 | 600 mg TID PO  | 88        | Prophylaxis                                         |
| October         | Year -4 | November     | Year -4 | 240 mg TID PO  | 33        | Chronic Suppression                                 |
| December        | Year -4 | February     | Year -3 | 600 mg TID PO  | 87        | Prophylaxis                                         |
| March           | Year -3 | June         | Year -3 | 480 mg TID PO  | 68        | Prophylaxis                                         |
| July            | Year -3 | September    | Year -3 | 480 mg BID PO  | 48        | Prophylaxis                                         |
| October         | Year -3 | August       | Year -2 | 640 mg BID PO  | 60        | Prophylaxis                                         |
| September       | Year -2 | October      | Year -2 | 700 mg BID PO  | 60        | Prophylaxis                                         |
| November        | Year -2 | January      | Year -1 | 600 mg BID PO  | 50        | Prophylaxis                                         |
| February        | Year -1 | April        | Year 1  | 680 mg BID PO  | 55        | Prophylaxis                                         |
| May             | Year 1  | May          | Year 1  | 700 mg BID PO  | 49        | Prophylaxis                                         |
| June            | Year 1  | July         | Year 1  | 880 mg BID PO  | 67        | Prophylaxis                                         |
