# Supplementary material
Source: PubMed Central journal article supplement (PMC7289554)
Supplement: jiaa020_suppl_supplementary_table3.pdf [file jiaa020_suppl_supplementary_table3.pdf]

**Supplementary Table 3: Dose or dose range for antivirals administered to patient during study period.**

| <b>Drug</b>                   | <b>Dose</b>                                                                                |
|-------------------------------|--------------------------------------------------------------------------------------------|
| IV Acyclovir                  | 30 mg/kg/day with increases up to 60 mg/kg/day for severe or treatment refractory disease  |
| PO Acyclovir*                 | 30 mg/kg/day with increases up to 120 mg/kg/day for severe or treatment refractory disease |
| Cidofovir                     | 5 mg/kg IV qweek                                                                           |
| Foscarnet                     | 120 mg/kg/day IV                                                                           |
| Pegylated Interferon Alpha 2B | 1 mcg/kg IV qweek                                                                          |
| Topical Cidofovir             | 2 - 3%                                                                                     |

\*PO Valacyclovir sometimes used in place of PO Acyclovir. Dose range for PO Valacyclovir was 58 - 122 mg/kg/day given as 1g PO BID or TID.
