# Supplementary material
Source: PubMed Central journal article supplement (PMC7289554)
Supplement: jiaa020_suppl_supplementary_table4.pdf [file jiaa020_suppl_supplementary_table4.pdf]

**Supplementary Table 4: Consensus single nucleotide differences between HSV-1 reference (Strain 17) and all 9 sequenced samples from patient and brother.**

| CDS   | CDS Nucleotide Position | Strain 17 Allele | Allele in HSV-1 from patient/brother | Variant Type | Strain 17 Amino Acid | Amino Acid in HSV-1 from patient/brother | G -> A | C -> T | APOBEC3 Dinucleotide* |
|-------|-------------------------|------------------|--------------------------------------|--------------|----------------------|------------------------------------------|--------|--------|-----------------------|
| UL5   | 693                     | C                | T                                    | S            |                      |                                          |        | Yes    | CC                    |
| UL10  | 614                     | C                | A                                    | NS           | P                    | Q                                        |        |        |                       |
| UL16  | 657                     | C                | T                                    | S            |                      |                                          |        | Yes    | GC                    |
| UL17  | 1684                    | G                | T                                    | S            |                      |                                          |        |        |                       |
| UL17  | 249                     | C                | T                                    | S            |                      |                                          |        | Yes    | CC                    |
| UL18  | 9                       | C                | T                                    | S            |                      |                                          |        | Yes    | CC                    |
| UL19  | 895                     | C                | T                                    | NS           | E                    | K                                        |        | Yes    | TC                    |
| UL21  | 39                      | C                | T                                    | S            |                      |                                          |        | Yes    | AC                    |
| UL23  | 527                     | C                | T                                    | NS           | R                    | Q                                        |        | Yes    | TC                    |
| UL28  | 1032                    | C                | T                                    | S            |                      |                                          |        | Yes    | TC                    |
| UL28  | 66                      | C                | T                                    | S            |                      |                                          |        | Yes    | GC                    |
| UL29  | 2894                    | C                | T                                    | NS           | S                    | N                                        |        | Yes    | GC                    |
| UL29  | 310                     | C                | G                                    | NS           | D                    | H                                        |        |        |                       |
| UL30  | 2226                    | A                | C                                    | S            |                      |                                          |        |        |                       |
| UL30  | 3250                    | G                | A                                    | NS           | E                    | K                                        | Yes    |        | TC                    |
| UL34  | 753                     | C                | A                                    | S            |                      |                                          |        |        |                       |
| UL36  | 7877                    | G                | A                                    | NS           | P                    | L                                        | Yes    |        | CC                    |
| UL37  | 1938                    | G                | A                                    | S            |                      |                                          | Yes    |        | TC                    |
| UL37  | 467                     | C                | T                                    | NS           | G                    | D                                        |        | Yes    | GC                    |
| UL37  | 273                     | C                | T                                    | S            |                      |                                          |        | Yes    | AC                    |
| UL43  | 695                     | A                | C                                    | NS           | D                    | A                                        |        |        |                       |
| UL45  | 261                     | T                | C                                    | S            |                      |                                          |        |        |                       |
| UL47  | 1521                    | C                | A                                    | S            |                      |                                          |        |        |                       |
| UL48  | 726                     | C                | T                                    | S            |                      |                                          |        | Yes    | AC                    |
| UL49A | 267                     | C                | T                                    | S            |                      |                                          |        | Yes    | GC                    |
| UL52  | 1468                    | G                | T                                    | NS           | G                    | C                                        |        |        |                       |
| UL52  | 1471                    | G                | C                                    | NS           | G                    | R                                        |        |        |                       |
| UL52  | 1474                    | A                | C                                    | NS           | T                    | P                                        |        |        |                       |
| UL54  | 96                      | C                | T                                    | S            |                      |                                          |        | Yes    | GC                    |
| US3   | 227                     | A                | C                                    | NS           | Q                    | P                                        |        |        |                       |
| US3   | 1312                    | C                | A                                    | S            |                      |                                          |        |        |                       |
| US8   | 1125                    | C                | T                                    | S            |                      |                                          |        | Yes    | TC                    |
| US10  | 736                     | C                | T                                    | NS           | V                    | I                                        |        | Yes    | AC                    |

\***APOBEC3 Dinucleotide:** APOBEC3 enzymes act preferentially on cytidines preceded by a T and to a lesser extent C. For variants that represent a C -> T change, this column gives the dinucleotide context for that C -> T change. For G -> A variants, this column gives the dinucleotide context for the C -> T change on the complement strand.
