# Supplementary material
Source: PubMed Central journal article supplement (PMC7289554)
Supplement: jiaa020_suppl_supplementary_table5.pdf [file jiaa020_suppl_supplementary_table5.pdf]

**Supplementary Table 5: Genic variation among sequenced HSV-1 samples.** Table includes information on single nucleotide consensus variants and minor variants that are present in 10% or more of reads in at least one sample. Pairs of variants highlighted in the same color represent one variant that is located in two overlapping CDS.

| CDS  | CDS Nucleotide Position | Reference Allele | Frequency of reference allele within individual samples |          |          |          |          |          |          |          |           | Alternative Allele | Variant Type | Reference Amino Acid | Alternative Amino Acid | G → A | C → T | APOBEC3 Dinucleotide* |
|------|-------------------------|------------------|---------------------------------------------------------|----------|----------|----------|----------|----------|----------|----------|-----------|--------------------|--------------|----------------------|------------------------|-------|-------|-----------------------|
|      |                         |                  | Brother                                                 | Sample 1 | Sample 2 | Sample 3 | Sample 4 | Sample 6 | Sample 8 | Sample 9 | Sample 11 |                    |              |                      |                        |       |       |                       |
| UL1  | 21                      | C                | 1                                                       | 1        | 0.733    | 1        | 1        | 1        | 1        | 1        | 1         | 1                  | T            | S                    |                        |       | Yes   | TC                    |
| UL1  | 98                      | C                | 1                                                       | 1        | 0.898    | 1        | 1        | 1        | 1        | 1        | 1         | 1                  | T            | NS                   | A                      | V     | Yes   | GC                    |
| UL1  | 647                     | G                | 1                                                       | 1        | 0.879    | 1        | 1        | 1        | 1        | 1        | 1         | 1                  | A            | NS                   | R                      | H     | Yes   | GC                    |
| UL2  | 100                     | G                | 1                                                       | 1        | 0.879    | 1        | 1        | 1        | 1        | 1        | 1         | 1                  | A            | NS                   | A                      | T     | Yes   | GC                    |
| UL2  | 212                     | G                | 1                                                       | 1        | 1        | 1        | 1        | 1        | 1        | 0.73     | 1         | 1                  | A            | NS                   | R                      | H     | Yes   | GC                    |
| UL3  | 103                     | G                | 1                                                       | 1        | 1        | 1        | 1        | 1        | 1        | 1        | 1         | 0.804              | C            | NS                   | D                      | H     |       |                       |
| UL4  | 53                      | G                | 0                                                       | 1        | 1        | 1        | 1        | 1        | 1        | 1        | 1         | 1                  | A            | NS                   | S                      | L     | Yes   | TC                    |
| UL5  | 1,302                   | C                | 1                                                       | 1        | 1        | 0.737    | 1        | 1        | 1        | 1        | 1         | 1                  | A            | NS                   | K                      | N     |       |                       |
| UL6  | 449                     | G                | 1                                                       | 1        | 1        | 1        | 1        | 0        | 1        | 1        | 1         | 1                  | A            | NS                   | G                      | D     | Yes   | GC                    |
| UL6  | 539                     | G                | 1                                                       | 1        | 1        | 1        | 1        | 1        | 0.447    | 1        | 1         | 1                  | A            | NS                   | G                      | D     | Yes   | AC                    |
| UL7  | 423                     | T                | 1                                                       | 1        | 0.841    | 1        | 1        | 1        | 1        | 1        | 1         | 1                  | C            | S                    |                        |       |       |                       |
| UL8  | 42                      | G                | 1                                                       | 1        | 1        | 0.875    | 1        | 1        | 1        | 1        | 1         | 1                  | A            | S                    |                        |       | Yes   | GC                    |
| UL8  | 832                     | A                | 0.802                                                   | 1        | 1        | 1        | 1        | 1        | 1        | 1        | 1         | 1                  | G            | NS                   | W                      | R     |       |                       |
| UL8  | 1,285                   | G                | 0                                                       | 0        | 0        | 0        | 0.154    | 0        | 0        | 1        | 1         | 1                  | A            | S                    |                        |       | Yes   | GC                    |
| UL9  | 1,359                   | C                | 1                                                       | 0.836    | 1        | 1        | 1        | 1        | 1        | 1        | 1         | 1                  | T            | S                    |                        |       | Yes   | GC                    |
| UL9  | 1,957                   | G                | 1                                                       | 1        | 1        | 1        | 1        | 1        | 1        | 1        | 0         | 1                  | A            | NS                   | R                      | C     | Yes   | GC                    |
| UL9  | 2,235                   | G                | 1                                                       | 0.887    | 0.892    | 1        | 1        | 1        | 1        | 1        | 1         | 1                  | T            | S                    |                        |       |       |                       |
| UL10 | 507                     | C                | 1                                                       | 1        | 0.787    | 1        | 1        | 1        | 1        | 0.828    | 1         | 1                  | T            | S                    |                        |       | Yes   | AC                    |
| UL10 | 780                     | C                | 1                                                       | 1        | 1        | 1        | 1        | 1        | 1        | 0.509    | 1         | 1                  | T            | S                    |                        |       | Yes   | TC                    |
| UL10 | 1,139                   | C                | 0.762                                                   | 1        | 1        | 1        | 1        | 1        | 1        | 1        | 1         | 1                  | G            | NS                   | S                      | W     |       |                       |
| UL12 | 541                     | C                | 0.889                                                   | 1        | 1        | 1        | 1        | 1        | 1        | 1        | 1         | 1                  | T            | NS                   | E                      | K     | Yes   | TC                    |
| UL12 | 575                     | C                | 1                                                       | 1        | 1        | 0.736    | 1        | 1        | 1        | 1        | 1         | 1                  | T            | NS                   | R                      | Q     | Yes   | CC                    |
| UL12 | 896                     | C                | 1                                                       | 1        | 1        | 1        | 1        | 1        | 1        | 0.788    | 1         | 1                  | T            | NS                   | G                      | D     | Yes   | GC                    |
| UL12 | 909                     | G                | 1                                                       | 1        | 1        | 1        | 1        | 1        | 1        | 0.82     | 1         | 1                  | A            | S                    |                        |       | Yes   | CC                    |
| UL12 | 1,459                   | G                | 1                                                       | 0.125    | 0.338    | 0        | 0        | 0        | 0        | 1        | 0         | 0                  | A            | NS                   | R                      | C     | Yes   | AC                    |
| UL13 | 167                     | A                | 0.183                                                   | 0        | 0        | 0        | 0        | 0        | 0        | 0        | 0         | 0                  | C            | NS                   | V                      | G     |       |                       |
| UL13 | 588                     | C                | 0                                                       | 0        | 0        | 0        | 0        | 0        | 0        | 1        | 1         | 1                  | T            | S                    |                        |       | Yes   | AC                    |
| UL13 | 1,270                   | A                | 1                                                       | 0        | 0.393    | 0        | 0        | 0        | 0        | 1        | 0         | 0                  | G            | NS                   | F                      | L     |       |                       |
| UL14 | 580                     | A                | 0.183                                                   | 0        | 0        | 0        | 0        | 0        | 0        | 0        | 0         | 0                  | C            | NS                   | S                      | A     |       |                       |
| UL15 | 23                      | C                | 1                                                       | 1        | 1        | 1        | 1        | 1        | 0.852    | 1        | 1         | 1                  | T            | NS                   | S                      | F     | Yes   | TC                    |
| UL15 | 465                     | G                | 1                                                       | 1        | 1        | 0.793    | 1        | 1        | 1        | 1        | 1         | 1                  | A            | S                    |                        |       | Yes   | GC                    |
| UL15 | 542                     | G                | 1                                                       | 1        | 1        | 1        | 1        | 1        | 1        | 0.792    | 1         | 1                  | C            | NS                   | G                      | A     |       |                       |
| UL17 | 1,262                   | G                | 1                                                       | 0.861    | 1        | 0.886    | 1        | 1        | 1        | 1        | 1         | 1                  | A            | NS                   | A                      | V     | Yes   | GC                    |
| UL17 | 1,793                   | G                | 0                                                       | 1        | 1        | 1        | 1        | 1        | 1        | 1        | 1         | 1                  | A            | NS                   | T                      | M     | Yes   | AC                    |
| UL19 | 2,036                   | C                | 1                                                       | 1        | 1        | 1        | 1        | 1        | 1        | 0        | 1         | 1                  | T            | NS                   | G                      | E     | Yes   | CC                    |
| UL19 | 2,711                   | C                | 1                                                       | 1        | 1        | 1        | 1        | 1        | 1        | 0.698    | 1         | 1                  | T            | NS                   | R                      | H     | Yes   | GC                    |
| UL19 | 4,036                   | C                | 1                                                       | 0.875    | 0.853    | 1        | 1        | 1        | 1        | 1        | 1         | 1                  | T            | NS                   | A                      | T     | Yes   | GC                    |
| UL20 | 658                     | C                | 1                                                       | 1        | 1        | 1        | 1        | 1        | 1        | 0.859    | 1         | 1                  | T            | NS                   | V                      | I     | Yes   | AC                    |
| UL21 | 783                     | G                | 1                                                       | 1        | 1        | 1        | 1        | 0        | 1        | 1        | 1         | 1                  | A            | S                    |                        |       | Yes   | GC                    |
| UL22 | 625                     | G                | 1                                                       | 1        | 1        | 1        | 0.225    | 1        | 1        | 1        | 1         | 1                  | A            | S                    |                        |       | Yes   | GC                    |
| UL22 | 1,438                   | G                | 1                                                       | 1        | 1        | 1        | 1        | 0        | 1        | 1        | 1         | 1                  | A            | S                    |                        |       | Yes   | GC                    |
| UL22 | 1,616                   | T                | 1                                                       | 0.644    | 0.823    | 1        | 1        | 1        | 1        | 0.425    | 1         | 1                  | C            | NS                   | Q                      | R     |       |                       |
| UL22 | 1,650                   | G                | 0.9                                                     | 1        | 1        | 1        | 1        | 1        | 1        | 1        | 1         | 1                  | T            | S                    |                        |       |       |                       |
| UL22 | 1,744                   | G                | 1                                                       | 1        | 1        | 1        | 1        | 0.874    | 1        | 1        | 1         | 1                  | A            | NS                   | L                      | F     | Yes   | GC                    |
| UL23 | 27                      | G                | 1                                                       | 1        | 1        | 0.898    | 1        | 1        | 1        | 1        | 1         | 1                  | A            | S                    |                        |       | Yes   | AC                    |
| UL23 | 419                     | G                | 1                                                       | 0.568    | 0.797    | 0.533    | 1        | 1        | 0.256    | 1        | 1         | 1                  | A            | NS                   | A                      | V     | Yes   | GC                    |
| UL23 | 717                     | A                | 0                                                       | 0        | 0        | 0        | 0        | 0        | 1        | 0        | 0         | 0                  | G            | S                    |                        |       |       |                       |
| UL23 | 765                     | C                | 0.852                                                   | 1        | 1        | 1        | 1        | 1        | 1        | 1        | 1         | 1                  | A            | NS                   | W                      | C     |       |                       |
| UL23 | 966                     | C                | 1                                                       | 1        | 1        | 1        | 1        | 0        | 1        | 1        | 1         | 1                  | T            | NS                   | M                      | I     | Yes   | GC                    |
| UL23 | 1,094                   | G                | 1                                                       | 1        | 1        | 1        | 1        | 1        | 0        | 1        | 1         | 1                  | A            | NS                   | A                      | V     | Yes   | GC                    |
| UL24 | 40                      | G                | 1                                                       | 1        | 1        | 0.898    | 1        | 1        | 1        | 1        | 1         | 1                  | A            | NS                   | V                      | M     | Yes   | AC                    |
| UL25 | 165                     | A                | 0.123                                                   | 0        | 0        | 0        | 0        | 0        | 0        | 0        | 0         | 0                  | G            | S                    |                        |       |       |                       |
| UL25 | 1,251                   | T                | 1                                                       | 1        | 1        | 1        | 1        | 1        | 0        | 1        | 1         | 1                  | C            | S                    |                        |       |       |                       |
| UL25 | 1,686                   | C                | 1                                                       | 0.127    | 0        | 0        | 0        | 0        | 0        | 1        | 0         | 0                  | T            | S                    |                        |       | Yes   | AC                    |
| UL26 | 1,135                   | G                | 1                                                       | 1        | 1        | 1        | 1        | 1        | 0        | 1        | 1         | 1                  | A            | NS                   | A                      | T     | Yes   | GC                    |
| UL27 | 181                     | C                | 1                                                       | 1        | 1        | 0.677    | 0        | 0        | 0.69     | 1        | 1         | 1                  | T            | NS                   | A                      | T     | Yes   | GC                    |
| UL27 | 268                     | C                | 1                                                       | 1        | 1        | 1        | 1        | 1        | 0.511    | 1        | 1         | 1                  | T            | NS                   | V                      | I     | Yes   | AC                    |
| UL27 | 438                     | G                | 0                                                       | 1        | 1        | 1        | 1        | 1        | 1        | 1        | 1         | 1                  | A            | S                    |                        |       | Yes   | TC                    |
| UL28 | 353                     | G                | 1                                                       | 1        | 1        | 1        | 1        | 1        | 0        | 1        | 1         | 1                  | A            | NS                   | A                      | V     | Yes   | GC                    |
| UL28 | 473                     | A                | 1                                                       | 0.724    | 1        | 1        | 1        | 1        | 1        | 1        | 1         | 1                  | G            | NS                   | L                      | P     |       |                       |
| UL29 | 348                     | G                | 1                                                       | 1        | 1        | 1        | 1        | 1        | 0        | 1        | 1         | 1                  | A            | S                    |                        |       | Yes   | GC                    |
| UL29 | 358                     | G                | 1                                                       | 1        | 1        | 1        | 1        | 1        | 0        | 1        | 1         | 1                  | A            | NS                   | R                      | C     | Yes   | AC                    |
| UL29 | 2,193                   | G                | 1                                                       | 1        | 1        | 1        | 1        | 1        | 1        | 1        | 1         | 0                  | A            | S                    |                        |       | Yes   | TC                    |
| UL29 | 2,851                   | C                | 1                                                       | 1        | 1        | 1        | 1        | 1        | 1        | 0.78     | 1         | 1                  | T            | NS                   | A                      | T     | Yes   | GC                    |
| UL29 | 2,914                   | C                | 1                                                       | 1        | 0.7      | 1        | 1        | 1        | 1        | 1        | 1         | 1                  | T            | NS                   | V                      | I     | Yes   | AC                    |
| UL29 | 2,937                   | G                | 1                                                       | 1        | 1        | 1        | 0.24     | 1        | 1        | 1        | 1         | 1                  | A            | S                    |                        |       | Yes   | TC                    |
| UL30 | 601                     | A                | 0                                                       | 0        | 0        | 0        | 0        | 0        | 0        | 1        | 0         | 0                  | G            | NS                   | T                      | A     |       |                       |
| UL30 | 974                     | C                | 1                                                       | 1        | 1        | 1        | 1        | 0.814    | 1        | 1        | 1         | 1                  | T            | NS                   | T                      | M     | Yes   | AC                    |
| UL30 | 1,158                   | C                | 0                                                       | 1        | 1        | 1        | 1        | 1        | 1        | 1        | 1         | 1                  | T            | S                    |                        |       | Yes   | AC                    |
| UL30 | 1,591                   | G                | 1                                                       | 1        | 1        | 1        | 1        | 1        | 1        | 0.115    | 1         | 1                  | A            | NS                   | D                      | N     | Yes   | TC                    |
| UL30 | 1,635                   | A                | 1                                                       | 1        | 1        | 1        | 1        | 1        | 0.878    | 1        | 1         | 1                  | G            | S                    |                        |       |       |                       |
| UL30 | 2,462                   | C                | 1                                                       | 1        | 1        | 1        | 1        | 0        | 1        | 1        | 1         | 1                  | T            | NS                   | T                      | M     | Yes   | AC                    |
| UL30 | 3,406                   | A                | 1                                                       | 1        | 1        | 1        | 1        | 0        | 1        | 1        | 1         | 1                  | G            | NS                   | K                      | E     |       |                       |
| UL30 | 3,671                   | G                | 1                                                       | 1        | 1        | 0.867    | 1        | 1        | 1        | 1        | 1         | 1                  | A            | NS                   | R                      | H     | Yes   | AC                    |

| CDS   | CDS Nucleotide Position | Reference Allele | Frequency of reference allele within individual samples |          |          |          |          |          |          |          | Alternative Allele | Variant Type | Reference Amino Acid | Alternative Amino Acid | G -> A | C -> T | APOBEC3 Dinucleotide* |           |
|-------|-------------------------|------------------|---------------------------------------------------------|----------|----------|----------|----------|----------|----------|----------|--------------------|--------------|----------------------|------------------------|--------|--------|-----------------------|-----------|
|       |                         |                  | Brother                                                 | Sample 1 | Sample 2 | Sample 3 | Sample 4 | Sample 6 | Sample 8 | Sample 9 |                    |              |                      |                        |        |        |                       | Sample 11 |
| UL31  | 903                     | G                | 1                                                       | 1        | 1        | 0.867    | 1        | 1        | 1        | 1        | 1                  | A            | S                    |                        |        | Yes    |                       | AC        |
| UL32  | 795                     | G                | 1                                                       | 1        | 1        | 0.836    | 1        | 1        | 1        | 1        | 1                  | A            | S                    |                        |        | Yes    |                       | GC        |
| UL32  | 937                     | C                | 1                                                       | 1        | 1        | 1        | 1        | 1        | 1        | 1        | 0.777              | T            | NS                   | A                      | T      |        | Yes                   | GC        |
| UL32  | 1,183                   | C                | 1                                                       | 1        | 1        | 1        | 1        | 1        | 1        | 1        | 0.255              | T            | NS                   | D                      | N      |        | Yes                   | TC        |
| UL32  | 1,416                   | C                | 0                                                       | 0.104    | 0.411    | 0        | 0.786    | 0        | 0        | 1        | 1                  | T            | S                    |                        |        |        | Yes                   | GC        |
| UL33  | 325                     | C                | 1                                                       | 0        | 0.473    | 0.144    | 1        | 0        | 0        | 1        | 1                  | T            | NS                   | R                      | C      |        | Yes                   | CC        |
| UL35  | 53                      | G                | 1                                                       | 1        | 1        | 1        | 1        | 1        | 0.764    | 1        | 1                  | A            | NS                   | R                      | Q      | Yes    |                       | CC        |
| UL36  | 1,282                   | C                | 1                                                       | 1        | 1        | 1        | 1        | 1        | 0.9      | 1        | 1                  | G            | NS                   | A                      | P      |        |                       |           |
| UL36  | 1,402                   | G                | 1                                                       | 1        | 1        | 1        | 1        | 1        | 1        | 1        | 0.745              | A            | NS                   | P                      | S      | Yes    |                       | GC        |
| UL36  | 1,635                   | C                | 0.854                                                   | 1        | 1        | 1        | 1        | 1        | 1        | 1        | 1                  | A            | S                    |                        |        |        |                       |           |
| UL36  | 1,771                   | C                | 0.897                                                   | 1        | 1        | 1        | 1        | 1        | 1        | 1        | 1                  | G            | NS                   | E                      | Q      |        |                       |           |
| UL36  | 2,737                   | T                | 1                                                       | 1        | 1        | 0.839    | 1        | 0        | 1        | 1        | 1                  | C            | NS                   | I                      | V      |        |                       |           |
| UL36  | 2,956                   | C                | 0                                                       | 0        | 0.145    | 0        | 0        | 0        | 0        | 1        | 0                  | T            | NS                   | A                      | T      |        | Yes                   | GC        |
| UL36  | 3,768                   | C                | 0                                                       | 1        | 1        | 1        | 1        | 1        | 1        | 1        | 1                  | T            | S                    |                        |        |        | Yes                   | TC        |
| UL36  | 4,760                   | C                | 0.895                                                   | 1        | 1        | 1        | 1        | 1        | 1        | 1        | 1                  | T            | NS                   | R                      | Q      |        | Yes                   | TC        |
| UL36  | 6,774                   | A                | 1                                                       | 1        | 1        | 1        | 1        | 0        | 1        | 1        | 1                  | G            | S                    |                        |        |        |                       |           |
| UL36  | 7,140                   | G                | 1                                                       | 1        | 0.732    | 1        | 1        | 1        | 1        | 1        | 1                  | A            | S                    |                        |        | Yes    |                       | AC        |
| UL36  | 8,474                   | G                | 1                                                       | 1        | 1        | 0.848    | 1        | 1        | 1        | 1        | 1                  | A            | NS                   | P                      | L      | Yes    |                       | CC        |
| UL36  | 8,945                   | G                | 1                                                       | 1        | 1        | 0.882    | 1        | 1        | 1        | 1        | 1                  | A            | NS                   | A                      | V      | Yes    |                       | GC        |
| UL37  | 829                     | G                | 1                                                       | 1        | 1        | 0.499    | 1        | 1        | 1        | 1        | 1                  | T            | NS                   | L                      | M      |        |                       |           |
| UL37  | 2,031                   | C                | 1                                                       | 1        | 0.77     | 1        | 1        | 1        | 1        | 1        | 1                  | T            | S                    |                        |        |        | Yes                   | TC        |
| UL37  | 3,134                   | G                | 1                                                       | 1        | 1        | 1        | 1        | 1        | 0.488    | 1        | 1                  | A            | NS                   | A                      | V      | Yes    |                       | GC        |
| UL39  | 134                     | A                | 1                                                       | 1        | 1        | 1        | 1        | 1        | 0.854    | 1        | 1                  | G            | NS                   | Y                      | C      |        |                       |           |
| UL39  | 304                     | G                | 1                                                       | 1        | 1        | 1        | 1        | 1        | 0.811    | 1        | 1                  | A            | NS                   | A                      | T      | Yes    |                       | GC        |
| UL39  | 369                     | C                | 1                                                       | 1        | 0.651    | 0.841    | 1        | 1        | 1        | 1        | 1                  | T            | S                    |                        |        |        | Yes                   | TC        |
| UL39  | 1,351                   | G                | 0                                                       | 0        | 0        | 0        | 0        | 0        | 0        | 1        | 1                  | T            | NS                   | V                      | L      |        |                       |           |
| UL39  | 2,388                   | C                | 0.879                                                   | 1        | 1        | 1        | 1        | 1        | 1        | 1        | 1                  | T            | S                    |                        |        |        | Yes                   | TC        |
| UL40  | 738                     | C                | 1                                                       | 0        | 0.148    | 0.133    | 0        | 0        | 0.123    | 1        | 0                  | T            | S                    |                        |        |        | Yes                   | GC        |
| UL40  | 937                     | C                | 1                                                       | 0        | 0.151    | 0        | 0        | 0        | 0        | 1        | 1                  | T            | S                    |                        |        |        | Yes                   | GC        |
| UL41  | 392                     | G                | 1                                                       | 1        | 1        | 1        | 1        | 0        | 1        | 1        | 1                  | T            | NS                   | S                      | Y      |        |                       |           |
| UL41  | 841                     | T                | 1                                                       | 1        | 1        | 1        | 1        | 1        | 0.9      | 1        | 1                  | C            | NS                   | T                      | A      |        |                       |           |
| UL42  | 573                     | G                | 1                                                       | 1        | 1        | 1        | 1        | 0        | 1        | 1        | 1                  | A            | S                    |                        |        | Yes    |                       | TC        |
| UL42  | 1,002                   | C                | 1                                                       | 1        | 1        | 1        | 1        | 1        | 1        | 0.88     | 1                  | T            | S                    |                        |        |        | Yes                   | CC        |
| UL42  | 1,230                   | G                | 1                                                       | 1        | 1        | 1        | 1        | 1        | 1        | 1        | 0                  | T            | NS                   | K                      | N      |        |                       |           |
| UL43  | 1,151                   | C                | 1                                                       | 1        | 1        | 1        | 1        | 1        | 1        | 1        | 0                  | T            | NS                   | A                      | V      |        | Yes                   | GC        |
| UL46  | 963                     | G                | 1                                                       | 1        | 1        | 0.845    | 1        | 1        | 0.887    | 1        | 1                  | A            | S                    |                        |        | Yes    |                       | CC        |
| UL47  | 401                     | A                | 1                                                       | 1        | 1        | 0.863    | 1        | 1        | 1        | 1        | 1                  | C            | NS                   | L                      | W      |        |                       |           |
| UL47  | 759                     | C                | 1                                                       | 1        | 1        | 1        | 1        | 0        | 1        | 1        | 1                  | T            | S                    |                        |        |        | Yes                   | GC        |
| UL47  | 1,497                   | G                | 1                                                       | 1        | 0.872    | 1        | 1        | 1        | 1        | 1        | 1                  | A            | S                    |                        |        | Yes    |                       | GC        |
| UL47  | 1,884                   | G                | 0                                                       | 0        | 0.191    | 0        | 0        | 0        | 0.116    | 1        | 0                  | A            | S                    |                        |        | Yes    |                       | CC        |
| UL49  | 372                     | G                | 1                                                       | 0.697    | 1        | 0.833    | 1        | 0        | 0.372    | 1        | 1                  | A            | S                    |                        |        | Yes    |                       | CC        |
| UL49A | 49                      | G                | 0                                                       | 0        | 0.168    | 0        | 0        | 0        | 0        | 1        | 1                  | A            | NS                   | L                      | F      | Yes    |                       | GC        |
| UL50  | 319                     | G                | 1                                                       | 1        | 1        | 1        | 0.197    | 1        | 1        | 1        | 1                  | A            | NS                   | V                      | M      | Yes    |                       | AC        |
| UL50  | 556                     | C                | 1                                                       | 1        | 1        | 1        | 1        | 1        | 0.435    | 1        | 1                  | T            | NS                   | R                      | W      |        | Yes                   | GC        |
| UL50  | 715                     | G                | 1                                                       | 1        | 1        | 1        | 1        | 0        | 1        | 1        | 1                  | A            | NS                   | V                      | M      | Yes    |                       | AC        |
| UL50  | 1,080                   | G                | 1                                                       | 1        | 1        | 1        | 1        | 1        | 0.506    | 1        | 1                  | A            | S                    |                        |        | Yes    |                       | GC        |
| UL52  | 845                     | G                | 1                                                       | 1        | 0.857    | 1        | 1        | 1        | 1        | 1        | 1                  | A            | NS                   | R                      | H      | Yes    |                       | GC        |
| UL52  | 2,325                   | C                | 0                                                       | 0        | 0.207    | 0        | 0        | 0        | 0        | 1        | 1                  | T            | S                    |                        |        |        | Yes                   | AC        |
| UL54  | 1,003                   | A                | 1                                                       | 1        | 1        | 1        | 0.889    | 1        | 1        | 1        | 1                  | G            | NS                   | T                      | A      |        |                       |           |
| UL55  | 57                      | G                | 0.765                                                   | 1        | 1        | 1        | 1        | 1        | 1        | 1        | 1                  | T            | S                    |                        |        |        |                       |           |
| UL56  | 59                      | G                | 1                                                       | 1        | 1        | 1        | 1        | 0        | 1        | 1        | 1                  | A            | NS                   | A                      | V      | Yes    |                       | GC        |
| US3   | 988                     | G                | 1                                                       | 1        | 1        | 1        | 0.136    | 1        | 1        | 1        | 1                  | A            | NS                   | V                      | M      | Yes    |                       | AC        |
| US3   | 1,027                   | G                | 1                                                       | 0.753    | 0.829    | 1        | 1        | 1        | 1        | 1        | 1                  | A            | NS                   | A                      | T      | Yes    |                       | GC        |
| US4   | 668                     | G                | 1                                                       | 1        | 1        | 0.824    | 1        | 0        | 1        | 1        | 1                  | A            | NS                   | R                      | H      | Yes    |                       | GC        |
| US5   | 112                     | G                | 1                                                       | 1        | 1        | 1        | 1        | 1        | 0.488    | 1        | 1                  | A            | NS                   | A                      | T      | Yes    |                       | GC        |
| US6   | 75                      | C                | 1                                                       | 1        | 1        | 1        | 1        | 1        | 1        | 1        | 0.753              | T            | S                    |                        |        |        | Yes                   | GC        |
| US6   | 91                      | G                | 0                                                       | 0        | 0        | 0        | 0        | 0        | 0        | 0        | 1                  | A            | NS                   | D                      | N      | Yes    |                       | TC        |
| US6   | 645                     | G                | 1                                                       | 1        | 1        | 1        | 1        | 0        | 1        | 1        | 1                  | A            | S                    |                        |        | Yes    |                       | AC        |
| US6   | 662                     | G                | 1                                                       | 0.857    | 1        | 1        | 1        | 1        | 1        | 1        | 1                  | A            | NS                   | R                      | H      | Yes    |                       | GC        |
| US6   | 938                     | C                | 1                                                       | 0.882    | 0.765    | 0.636    | 0        | 1        | 0.801    | 1        | 1                  | T            | NS                   | P                      | L      |        | Yes                   | CC        |
| US6   | 1,012                   | A                | 1                                                       | 1        | 1        | 1        | 1        | 1        | 1        | 0        | 1                  | C            | NS                   | N                      | H      |        |                       |           |
| US8A  | 300                     | G                | 1                                                       | 1        | 1        | 1        | 1        | 0        | 1        | 1        | 1                  | A            | S                    |                        |        | Yes    |                       | GC        |
| US9   | 55                      | C                | 1                                                       | 1        | 1        | 1        | 1        | 0        | 1        | 1        | 1                  | T            | NS                   | P                      | S      |        | Yes                   | GC        |
| US10  | 258                     | G                | 1                                                       | 0.826    | 0.816    | 0.805    | 0.755    | 0.783    | 0.232    | 0.849    | 0.83               | T            | S                    |                        |        |        |                       |           |
| US10  | 397                     | C                | 1                                                       | 1        | 1        | 1        | 1        | 1        | 0.324    | 1        | 1                  | T            | NS                   | A                      | T      |        | Yes                   | GC        |
| US10  | 666                     | G                | 1                                                       | 0.9      | 1        | 1        | 1        | 1        | 1        | 1        | 1                  | A            | S                    |                        |        | Yes    |                       | AC        |
| US11  | 409                     | G                | 1                                                       | 0.826    | 0.816    | 0.805    | 0.755    | 0.783    | 0.232    | 0.849    | 0.83               | T            | S                    |                        |        |        |                       |           |

\*APOBEC3 Dinucleotide: APOBEC3 enzymes act preferentially on cytidines preceded by a T and to a lesser extent C. For variants that represent a C -> T change, this column gives the dinucleotide context for that C -> T change. For G -> A variants, this column gives the dinucleotide context for the C -> T change on the complement strand.
