# Supplementary material
Source: PubMed Central journal article supplement (PMC7289554)
Supplement: jiaa020_suppl_supplementary_table6.pdf [file jiaa020_suppl_supplementary_table6.pdf]

| <b>Supplementary Table 6: Number of single nucleotide consensus differences between pairs of sequenced samples.</b> |                |                 |                 |                 |                 |                 |                 |                 |                  |
|---------------------------------------------------------------------------------------------------------------------|----------------|-----------------|-----------------|-----------------|-----------------|-----------------|-----------------|-----------------|------------------|
|                                                                                                                     | <b>Brother</b> | <b>Sample 1</b> | <b>Sample 2</b> | <b>Sample 3</b> | <b>Sample 4</b> | <b>Sample 6</b> | <b>Sample 8</b> | <b>Sample 9</b> | <b>Sample 11</b> |
| <b>Brother</b>                                                                                                      | 0              | 11              | 11              | 12              | 17              | 37              | 21              | 16              | 22               |
| <b>Sample 1</b>                                                                                                     | 11             | 0               | 0               | 1               | 8               | 26              | 10              | 17              | 15               |
| <b>Sample 2</b>                                                                                                     | 11             | 0               | 0               | 1               | 8               | 26              | 10              | 17              | 15               |
| <b>Sample 3</b>                                                                                                     | 12             | 1               | 1               | 0               | 9               | 27              | 11              | 18              | 16               |
| <b>Sample 4</b>                                                                                                     | 17             | 8               | 8               | 9               | 0               | 32              | 18              | 21              | 19               |
| <b>Sample 6</b>                                                                                                     | 37             | 26              | 26              | 27              | 32              | 0               | 34              | 43              | 41               |
| <b>Sample 8</b>                                                                                                     | 21             | 10              | 10              | 11              | 18              | 34              | 0               | 27              | 25               |
| <b>Sample 9</b>                                                                                                     | 16             | 17              | 17              | 18              | 21              | 43              | 27              | 0               | 16               |
| <b>Sample 11</b>                                                                                                    | 22             | 15              | 15              | 16              | 19              | 41              | 25              | 16              | 0                |
