# Supplementary material
Source: PubMed Central journal article supplement (PMC7289554)
Supplement: jiaa020_suppl_supplementary_table7.pdf [file jiaa020_suppl_supplementary_table7.pdf]

**Supplementary Table 7: Turn-around times for samples sent for phenotypic antiviral resistance testing.** "Turn-around time" denotes time in days from sample collection to receipt of results by clinical team. "Return time" denotes time in days from receipt of sample by lab performing phenotypic testing to receipt of results by clinical team.

| Sample    | Acyclovir Turn-Around Time | Acyclovir Return Time | Foscarnet Turn-Around Time | Foscarnet Return Time |
|-----------|----------------------------|-----------------------|----------------------------|-----------------------|
| Brother   | 34                         | 28                    | 34                         | 28                    |
| Sample 3  | 37                         | 30                    | 37                         | 30                    |
| Sample 4  | 30                         | 13                    | 37                         | 20                    |
| Sample 5  | 26                         | 22                    | 33                         | 29                    |
| Sample 7  | 13                         | 8                     | 42                         | 36                    |
| Sample 8  | 48                         | 43                    | 48                         | 43                    |
| Sample 10 | 27                         | 11                    | 27                         | 11                    |
| Sample 12 | 18                         | 14                    | 18                         | 14                    |
